23 Albert Einstein College of Medicine, Department of Epidemiology and Population Health,

24 Bronx, NY

25 The Rockefeller University, Center for Clinical and Translational Science, New York, NY

26

27 **ABSTRACT**

28 **Background:** Some patients' depression persists despite evidence-based interventions;  
29 understanding factors associated with depression persistence could inform screening and  
30 treatment. We used a novel mixed-methods approach to examine demographic, clinical, and  
31 social factors affecting depression persistence among older, low-income women; we also  
32 assessed the utility of this approach for evaluating intervention fidelity.

33 **Methods:** Data used for this study were generated from a comparative effectiveness study  
34 comparing the impact of prevention care management (PCM) versus a collaborative care  
35 intervention (CCI) on depression among women overdue for cancer screening: We reviewed 700  
36 care manager logs to identify themes among patients' experiences and analyzed language use  
37 using NVivo<sup>®</sup>'s natural language processing (NLP) functionality. 757 women age 50-64 who  
38 screened positive for depression at baseline using the Patient Health Questionnaire (PHQ)-9 and  
39 were overdue for  $\geq 1$  cancer screening test (breast, cervical, and/or colorectal) participated. All  
40 received primary care in XXX Federally Qualified Health Centers. We used NLP to quantify  
41 differences in language use across intervention groups and explored how often themes appeared  
42 in logs of participants whose depression did not meaningfully improve based on PHQ-9 scores.  
43 Differences in demographic, clinical, and social factors were examined.

44 **Results:** Participants with persistent depression were more likely to discuss pain, fear, and  
45 transportation. Asthma and anxiety were associated with lower likelihood of depression  
46 remission, while no differences were observed in depression remission rates among those with  
47 diabetes or hypertension. Patient-centered words, including "needs" and "feelings", were more  
48 common in the CCI group, while procedure-related words, like "screening" and  
49 "mammography", appeared more frequently in the PCM group.

50 **Conclusions:** Patient-related factors and social barriers contributed to depression persistence.

51 NLP identified patterns of language use in case logs, suggesting unmet needs among depressed  
52 patients. NLP is an efficient, effective method for identifying themes in unstructured text and  
53 monitoring intervention fidelity.

54

55 **Key words:** *depression, text analytics, natural language processing (NLP), social determinants*  
56 *of health (SDoH), practice-based research network (PBRN), Federally Qualified Health Center*  
57 *(FQHC), artificial intelligence (AI), analytics*

58

## 59 1. BACKGROUND AND SIGNIFICANCE

60 Depression is a common condition with serious implications for individual and  
61 population health.<sup>1-3</sup> Depression disproportionately affects women and older adults.<sup>1</sup> Individuals  
62 with depression are more likely to experience poorer health outcomes,<sup>4,5</sup> engage in health-risk  
63 behaviors,<sup>6</sup> and incur higher healthcare costs.<sup>7</sup> Depression is also associated with significant  
64 societal costs due to decreased worker productivity and absenteeism.<sup>8,9</sup> The World Health  
65 Organization estimates depression and anxiety disorders account for over one trillion dollars in  
66 expenditures from productivity losses alone.<sup>10</sup> Depression among older patients is associated  
67 with functional decline,<sup>11</sup> disability,<sup>12</sup> increased use of primary care, and reduced health-related  
68 quality of life.<sup>7,13</sup> While effective treatments are available, many patients do not receive them.<sup>14</sup>  
69 Moreover, research suggests that some patients' depression persists despite evidence-based  
70 interventions.<sup>8,15,16</sup> Improving our understanding of factors associated with depression  
71 persistence could inform targeted screening and treatment.

72 Research suggests factors associated with depression include: personal or family history,  
73 exposure to physical or psychological trauma, and chronic medical and psychological conditions  
74 such as hypertension, diabetes, asthma, and anxiety.<sup>2,17-19</sup> Particularly among older adults, social  
75 and environmental factors, including isolation, loneliness, and lack of community engagement  
76 also play a crucial role in psychological well-being.<sup>17,20,21</sup> Formal examinations of associations  
77 between social determinants of health and psychological well-being are challenging. Social  
78 determinants are often not assessed in clinical encounters. When they are, they are rarely  
79 captured in structured data fields in electronic health records (EHRs) which limits the utility of  
80 traditional quantitative analytic techniques in studying these associations.<sup>22</sup>

81 Natural language processing (NLP) is an advanced form of qualitative analysis that  
82 employs algorithms to interpret and manipulate language. Text analytics is a type of NLP which  
83 translates patterns in text into data suitable for thematic and quantitative analysis.<sup>23</sup> These  
84 techniques demonstrate promise in analyzing unstructured clinical data. Orescovik et al. (2017)  
85 highlighted the effectiveness of NLP in predicting need for additional services among patients  
86 with “high-risk social determinants of health.”<sup>24</sup> Edgcomb et al (2021) used NLP to differentiate  
87 risk of suicide attempts and self-harm among women with mental illness.<sup>25</sup>

88 Previously, we completed a randomized controlled comparative effectiveness study  
89 among depressed women overdue for at least one cancer screening test (breast, cervical or  
90 colorectal) We randomized 757 English or Spanish speaking women to two different  
91 interventions. We observed that change in depressive symptoms acted as an effect modifier in  
92 the relationship between the intervention and receipt of age-appropriate cancer screening. Those  
93 whose depression did not improve or only improved modestly were less likely to be up to date  
94 with cancer screening tests at the end of the study.

95 To better understand why some patients’ depression persisted despite evidence-based  
96 interventions, and to ensure that our observations were not the result of contamination between  
97 study arms, we used a mixed-methods approach to examine differences in the content of case  
98 logs maintained by care managers who delivered the interventions in this study. Our approach  
99 incorporated quantitative analysis as well as text analytics. We compared language use between  
100 participants in each study arm as well as between participants whose depression had and had not  
101 improved significantly at 12-month follow-up. We also explored the impact of selected baseline  
102 covariates, including anxiety, chronic medical conditions, and highest attained education level on  
103 depression outcomes.

104 **2. OBJECTIVES**

105 Our study objectives were to:

- 106 1) Identify factors associated with depression persistence by examining differences in the content  
107 of case logs maintained by care managers in each intervention arm;  
108 2) Assess fidelity of interventions.

109 **3. METHODS**

110 **3.1 Participant population**

111 Sampling strategy and practice sites are described in detail elsewhere.<sup>27,28</sup> Our study  
112 included 757 women ages 50-64 who screened positive for depression at baseline (PHQ-9  $\geq$  8)  
113 and were overdue for at least one cancer screening test (breast, cervical, and/or colorectal). All  
114 participants received primary care at one of six Federally Qualified Health Centers (FQHCs) in  
115 Bronx NY. A total of 379 women were randomized to PCM and 378 to CCI. For this secondary  
116 analysis (i.e., focus of this paper), we excluded participants with no PHQ-9 recorded at 12-month  
117 follow-up (n=126), and participants without case logs (n=25). There was some overlap between  
118 these cases, resulting in 128 excluded participants.

119 **3.2 Interventions**

120 Both study arms involved monthly participant intervention calls performed by separate,  
121 project-supported care managers who were study staff working on-site at the health centers. The  
122 CCI care managers provided support and patient navigation regarding cancer screening needs  
123 and mental health, including past and present participation in mental health treatment, including  
124 whether the participant was currently taking antidepressant medications and/or participating in  
125 therapy. PCM care managers addressed only barriers to cancer screening.

126 Appendix A contains additional detail about each intervention. To ensure fidelity in the  
127 PCM and CCI intervention protocols, separate weekly supervisory meetings were conducted  
128 with both PCM and CCI care managers to review the number of calls completed, content of calls,  
129 and barriers to implementation.

130 Care managers for both groups kept electronic narrative records or case logs of each  
131 discussion they had with study participants. Data were maintained in secure, password-protected  
132 files using REDCAP and included: date, duration, and type of encounter (telephone, in person);  
133 screening tests received since last call; upcoming primary care and cancer screening  
134 appointments; barriers to cancer screening; and readiness to obtain overdue cancer screening  
135 tests.

### 136 **3.3 Data collected**

137 Unstructured data were found in the form of case logs. Structured data were obtained  
138 from self-report surveys or the participant's electronic health record (EHR) and included: PHQ-  
139 9,<sup>32</sup> Generalized Anxiety Disorder (GAD)-7,<sup>33</sup> age, race/ethnicity, language, education level  
140 attained, and diagnoses of asthma, hypertension, diabetes, and hyperlipidemia.

141 PHQ-9 scores were obtained by study staff at baseline and twelve-month follow-up. Due  
142 to variation in participants' baseline depression status, we sought to detect all clinically  
143 meaningful improvements in depression rather than only complete remission of depressive  
144 symptoms. Our approach allowed us to capture both modest reductions in depressive symptoms  
145 among those with less severe depression at baseline, as well as clinically significant reductions  
146 among those with more severe depression at baseline, who in some cases still met criteria for  
147 depression according to the PHQ-9. We created two variables corresponding to change in  
148 depression symptoms: clinically meaningful improvement (CI) (yes=PHQ-9  $\leq$  8 at twelve-month



149 follow-up or a 50% reduction from baseline)<sup>34</sup> and depression remission (OR) (yes=PHQ-9 <5 at  
150 twelve-month follow-up).<sup>35</sup> Anxiety was defined as a GAD-7  $\geq$  10 at baseline.<sup>35</sup>

### 151 **3.4 Unstructured qualitative data analysis**

152 We first conducted a manual review of 700 case logs to identify recurrent themes. Once  
153 we reached theme saturation, we created a list of terms mapping to those themes displayed in  
154 Table 1. We then conducted textual analysis using NVivo<sup>®</sup> software for Mac<sup>®</sup> version 12. We  
155 generated word frequencies for the entire sample and examined PCM and CCI groups  
156 individually, using targeted queries to compare word frequencies between the two intervention  
157 arms to assess fidelity. We used the NVivo<sup>®</sup> word “stem functionality,” which allows the  
158 investigator to search for a group of similar terms with a common stem (i.e., “sick\*” which  
159 includes: sick, sickness, sickly, sicker, sickest, sickening) and generated word clouds and tables  
160 summarizing frequency of word use to examine data within groups. We then used matrices to  
161 examine differences in frequency of word use across groups. Word trees were used to facilitate  
162 an understanding of how terms were being used and inform our interpretations. We also used  
163 NVivo<sup>®</sup> to create datasets pertaining to the frequency with which themes were mentioned and  
164 compared those proportions between participants who experienced/did not experience (a)  
165 clinically meaningful improvement; or (b) depression remission.

### 166 **3.5 Quantitative analysis**

167 For quantitative analyses, we used the datasets generated from NVivo<sup>®</sup> to compute chi  
168 squares and compare the frequencies with which specific themes appeared in case logs of those  
169 whose depression did versus did not significantly improve and did versus did not remit. We used  
170 logistic regressions with depression significantly improved (0=depression not significantly  
171 improved, 1=depression significantly improved) and depression remitted (0=depression not

172 remitted, 1=depression remitted) as the outcome variables to examine the impact of age and  
173 comorbid chronic conditions, including asthma, anxiety, and hypertension on depression  
174 outcomes. We conducted both univariate and multivariate analyses using SAS<sup>®</sup> version 9.4 for  
175 PC.

## 176 **4. RESULTS**

### 177 **4.1 Participant characteristics**

178 After excluding participants missing case logs or a PHQ-9 score at 12-month follow-up,  
179 there were 629 participants (81%) included in this analysis. The PCM and CCI groups were  
180 comparable with respect to age, race/ethnicity, language, and highest level of education attained.  
181 Table 2 contains basic descriptive information for these participants. The mean ages were 55.9  
182 years (Standard Deviation (SD)=4.2) and 56.2 years (SD=4.25) in the PCM and CCI groups,  
183 respectively. In both groups, for approximately 25% of participants, the highest level of  
184 education attained was less than 8 years. 81% of participants in the PCM group and 78% of  
185 participants in the CCI group identified as being Hispanic. Spanish was the preferred language  
186 for more than half of participants in both groups.

### 187 **4.2 Manual review of case logs**

188 A manual review of case logs revealed a number of different themes. Case-log texts  
189 corresponding to each theme are displayed in Table 3.

### 190 **4.3 Differences between study arms and assessment of intervention fidelity**

191 Notable differences were observed between the text from case logs for PCM and CCI  
192 arms. The most commonly used terms were: “patient,” “screens,” “cancer,” “up to date,”  
193 “barriers,” and “assessment.” For the CCI group, “patient” was the most common term, used  
194 over 3,000 times throughout case logs (weighted percentage = 5.6%). In the PCM group,

195 “patient” was the fifth most common term used with a weighted frequency of 2.0%. In the PCM  
196 group, “screening” was the most common term with a weighted percentage of 3.7%, whereas  
197 “screens” was the second most commonly used term in the CCI group with a weighted  
198 percentage of 2.9%. Other notable differences between these groups included higher frequency  
199 use of the words, “feelings,” “hospital,” and “needs” among the CCI group, and a higher  
200 frequency of the procedure-related words including, “colonoscopy” “mammogram,” “scheduled”  
201 among the PCM group. Figure 1 displays word clouds for the case logs of participants in the  
202 PCM vs. CCI intervention groups, respectively. The size and position of the word correspond to  
203 the frequencies with which each word appears (larger words that are more central are the most  
204 frequently used).<sup>1</sup>

#### 205 **4.4 Differences by baseline PHQ-9 score**

206 The range of PHQ-9 scores at baseline was 8-24 compared to 0-24 at the 12-month  
207 follow-up. Nearly 40% of participants (292/763) experienced clinically significant improvements  
208 in their depressive symptoms, and nearly 50% (355/763) of participants’ depression remitted;  
209 these rates did not differ between intervention groups.

210 Patients with higher baseline PHQ-9 scores were less likely to experience clinically  
211 significant improvements and/or remission of depression symptoms during the study period. The  
212 percentage of participants whose depression significantly improved with a baseline PHQ-9 of 9  
213 was 25% lower than that among participants with a baseline PHQ-9 of 8. Similarly, only 4% of  
214 participants with a baseline PHQ-9 score of 15 experienced a clinically significant improvement  
215 in their depressive symptoms, compared to 16% with a baseline PHQ-9 of 8.

#### 216 **4.5 Differences by clinically significant improvement in depression versus not**

---

<sup>1</sup> NVivo® filters out common terms, such as: the, to, from, etc.

217 Figure 2 compares the word clouds for case logs of participants whose depression did and  
218 did not significantly improve (because we did not observe a significant difference in depression  
219 outcomes between the two intervention arms, we combined both groups for this analysis). On  
220 visual inspection, the frequency of word use does not differ between the two groups, with words  
221 such as “barriers” appearing with equal frequency.

222 Mention of fear was slightly less common among those whose depression improved  
223 (OR = 0.83, 95% CI: 0.4, 1.7, chi-square=0.26,  $p=0.61$ ). However, with respect to social  
224 determinants of health, those whose depression significantly improved were about a third as  
225 likely to report issues related to transportation as those whose depression did not significantly  
226 improve (OR=0.3, 95% CI: 0.085, 1.02, chi-square=4.2,  $p=0.04$ ). Those whose depression had  
227 improved were nearly twice as likely (OR = 1.7; 95% CI: 1.1, 2.7, chi-square=5.5,  $p=0.02$ ) to  
228 discuss financial hardships with their care manager as those whose depression did not.

229 Table 4 displays differences in the frequency of references to specific themes and number  
230 of unique participants referencing those themes among those who did and did not experience a  
231 clinically meaningful improvement in their depressive symptoms. At the case-log level, there  
232 were differences in the percentages of case logs referencing death, illness, housing, pain, or  
233 substance use across these two groups. We observed 176 references to pain among 51 unique  
234 patients whose depression had not improve compared to 74 references among 24 unique patients  
235 whose depression had improved. There were 459 references to sickness or illness among 123  
236 unique patients whose depression had not improve compared to 358 references among 81 unique  
237 patients whose depression had improved.

238

#### 239 **4.6 Differences between those whose depression remitted vs. not remitted**

240 Participants whose depression had not remitted by the end of study were almost three  
241 times more likely to discuss pain (OR = 2.75; 95% CI: 1.4, 5.2) as well as fear (OR = 2.5; 95%  
242 CI: 1.0, 6.2). These participants were also more likely to discuss issues related to transportation  
243 (OR = 1.6, 95% CI: 0.61, 4.2). The word “barriers” appeared almost twice as frequently among  
244 participants whose depression remitted (3.05% vs 1.87%). References to substance use problems  
245 were comparable between groups.

#### 246 **4.7 Differences according to comorbidities**

247 Univariate analysis using structured data revealed that participants with comorbid anxiety  
248 at baseline were significantly less likely to experience clinically significant improvements in  
249 their depressive symptoms at the twelve-month follow-up (OR = 0.34, 95% CI: 0.244, 0.483).  
250 Participants with asthma were about half as likely (OR = 0.58, 95% CI: 0.41, 0.80) as those  
251 without asthma to report a clinically significant improvement. Participants with diabetes and  
252 hypertension were slightly less likely to experience improvements in their depression symptoms  
253 (OR = 0.83 and 0.85, respectively), but neither association was statistically significant.  
254 Multivariate analysis revealed that both asthma and anxiety were associated with a significantly  
255 lower likelihood of experiencing improvements in depressive symptoms. Participants with  
256 asthma were about two thirds as likely (OR = 0.65, 95% CI: 0.458, 0.933) as those without  
257 asthma to report remission of depressive symptoms. Neither hypertension nor diabetes appeared  
258 to be significantly associated with remission of depression. Multivariate analysis revealed that  
259 anxiety was the only factor significantly associated with a decreased likelihood of remission of  
260 depression (OR = 0.35, 95% CI: 0.25, 0.50), while asthma approached statistical significance  
261 (OR = 0.74, 95% CI: 0.513, 1.076).

## 262 5. DISCUSSION

263 In this study of low-income women residing in Bronx NY, multiple patient-related and  
264 social factors were associated with improvements and remission of depression over the twelve-  
265 month study follow-up period. These included chronic pain, fear, financial issues, and  
266 transportation difficulties. Additionally, participants with comorbid anxiety or asthma were  
267 significantly less likely to report clinically significant improvements in depressive symptoms or  
268 remission of depression at the end of the study. Results from NLP indicated that more frequent  
269 use of procedure-focused terms in the PCM arm and patient-centered terms in the CCI arm. This  
270 difference provided evidence of the maintenance of intervention fidelity for the two intervention  
271 arms. These findings also suggest that NLP can be a valuable tool in analyzing unstructured,  
272 qualitative data to assess patient factors as well as intervention fidelity in health services  
273 research.

274 Notably, some differences in language use observed at the case-log level were not  
275 statistically significant at the patient level. This suggests certain issues recurred among a small  
276 subset of participants whose depression persisted, despite the evidence-based interventions. This  
277 finding has important implications for future efforts to leverage the use of NLP-type approaches  
278 for analyzing unstructured, qualitative data for identification of high-risk groups and for  
279 monitoring treatment outcomes.

280 The fact that case logs of participants whose depression did not remit were nearly three  
281 times more likely to contain mention of pain supports previous work demonstrating a higher  
282 prevalence of chronic pain among those with more severe depression.<sup>36</sup> Tsuji et al (2016) also  
283 observed greater functional limitations among participants with comorbid depression and chronic  
284 pain, as opposed to those with either condition alone.<sup>37-39</sup> Similarly, more frequent use of terms

285 related to transportation among those whose depression did not improve or remit adds to  
286 previous research which suggests that transportation difficulties can present a major but  
287 modifiable barrier to accessing appropriate healthcare services that has a significant impact on  
288 clinical, social and emotional well-being, particularly among the older adults.<sup>40,41</sup> A recent study  
289 conducted in the United Kingdom revealed that providing older adults with free bus passes was  
290 associated with significant reductions in depressive symptoms and feelings of loneliness.<sup>42</sup> Many  
291 FQHCs provide transportation allowances (subway or bus passes) to enhance access to care and  
292 related services<sup>43</sup>; future research should build in coverage for these types of benefits in order to  
293 reduce or eliminate access barriers.<sup>44</sup> This finding also underscores the value of using a  
294 community-based approach when designing interventions to address depression, particularly  
295 among older patients for whom loneliness and social isolation appear to play a larger role in  
296 emotional well-being.<sup>44</sup>

297         The case logs of those whose depression improved were nearly twice as likely as those  
298 whose depression did not improve to mention financial issues. This finding is inconsistent with  
299 previous research that found a positive association between financial hardship and depression.<sup>45</sup>  
300 However, this finding within the context of our study may reflect that participants shared  
301 information about past financial issues or articulated how they became connected with resources  
302 and services that improved their financial situation.

303         Co-occurrence of both asthma and anxiety was associated with a lower likelihood of both  
304 clinically significant improvements in depression and remission of depression. Previous  
305 literature supports a higher prevalence of depression among patients with asthma,<sup>46,47</sup> as well as a  
306 higher likelihood of poor asthma control among those with comorbid depression.<sup>48,49</sup> We are  
307 unaware of previous studies, however, reporting that patients with comorbid asthma may also

308 suffer from depression that persists despite intervention. Higher rates of persistence of  
309 depression among those with comorbid anxiety could explain high rates of co-occurrence  
310 between these conditions throughout the lifespan and argues for the need for better integration of  
311 mental and behavioral health services into primary care.<sup>50,51</sup>

312 We observed clear differences in language use between the CCI and PCM study arms.  
313 More frequent use of patient-centered terms such as “patient,” “feelings,” and “needs” in the CCI  
314 arm suggest that, as intended, care managers in this study arm were more likely to address issues  
315 related to participants’ mental health. In contrast, more frequent use of procedural terms, such as  
316 “screening” and “mammogram” indicate that care managers in the PCM arm were more focused  
317 on addressing needs related to cancer screening. These findings suggest that efforts to prevent  
318 and/or minimize contamination between study arms were successful and lend further support to  
319 value offered by NLP, and text analytics in particular, when analyzing unstructured clinical  
320 notes. We believe this approach offers an efficient automated approach to demonstrating both  
321 clinical process quality and treatment fidelity. Moreover, in the current healthcare climate with  
322 increased use of telemedicine, we believe this methodology may be a useful tool in assessing  
323 consistency and quality of remote clinical consultations.

324 This study had several limitations. First, the case logs were manually recorded by the care  
325 managers and not by the participants themselves. Due to privacy concerns, calls were not audio  
326 recorded. Direct audio recording with automated transcription of the care management calls  
327 would have reduced documentation errors. Furthermore, documentation practices may differ  
328 between care managers despite their extensive training which might have contributed to selection  
329 bias by focusing on known barriers that the intervention was designed to address. Improvements  
330 observed in depression over the study period may be due to the natural history of depression or



331 due to regression to the mean, or some combination of both, rather than resulting from the  
332 putative mechanisms of either intervention; alternatively, the focus of both interventions on  
333 overcoming barriers to accessing care may have had similar non-differential effects on both  
334 cancer screening and depression outcomes. Lastly, there may be limitations of using more  
335 traditional quantitative analytic approaches when interpreting patterns in language use. More  
336 work is needed to examine the utility of these methods in analyzing unstructured, qualitative  
337 data. In developing our coding scheme for textual analysis, we relied on our judgment to develop  
338 a group of search terms associated with each theme, which may have compromised the  
339 sensitivity of our results. Future work could incorporate weighting in order to capture and fully  
340 assess the salience of certain themes between groups.

## 341 **6. CONCLUSIONS**

342 This study highlights the importance of certain patient-related and social factors such as  
343 chronic pain, comorbid chronic conditions (e.g., anxiety and asthma), and access barriers such as  
344 transportation in predicting depression improvement among older, low-income women.  
345 Moreover, using text analytics, we identified different patterns of language use between  
346 intervention arms, as well as between those whose depression improved or remitted versus those  
347 whose depression did not change. This suggests these emerging computerized qualitative  
348 methods, when combined with quantitative data in a mixed methods study, can provide novel  
349 insights into a variety of methodologic and quality of care issues, including automated  
350 monitoring of intervention fidelity and prediction of response to treatment.

351 **CLINICAL RELEVANCE STATEMENT** This study demonstrates the utility of natural language  
352 processing in understanding factors underlying depression persistence in a sample of women  
353 ages 50-65. Whereas the use of quantitative analysis only did not offer insight into why some

354 patients' depression persisted one year after study initiation, using NLP to analyze unstructured  
355 clinical data allowed us to identify a number of factors, including social determinants of health,  
356 that predicted persistence of depressive symptoms.

### 357 **MULTIPLE CHOICE QUESTIONS**

- 358 1) In this study, natural language processing was used to do all of the following, except
- 359 a. Assess fidelity of intervention arms
  - 360 b. Assess depression severity
  - 361 c. Identify factors associated with depression persistence
  - 362 d. Explore differences in language use between study groups

363 **The correct answer is B.** We did not use natural language processing to assess depression  
364 severity. The PHQ-9 was used to assess depression severity at both the outset of the study as well  
365 as at the conclusion of the study, 12 months later. Changes in depression severity as measured by  
366 the PHQ-9 were the primary outcome of this study. We used natural language processing to  
367 understand factors associated with differences in our study outcome. NLP was used to assess  
368 fidelity of treatment arms. This was done by comparing language use in the case logs of  
369 participants in both study arms, wherein we did observe notable differences. NLP was also used  
370 to identify factors associated with depression persistence by exploring differences in language  
371 use between those whose depressive symptoms did and did not improve.

- 372 2) Which of the following factors did this study demonstrate to be associated with  
373 depression persistence?
- 374 a. Age
  - 375 b. Location where primary care was received
  - 376 c. Chronic pain

377 d. Gender

378 **The correct answer is C.** Our analyses revealed that repeated mention of pain in study  
379 participants' case logs was associated with an increased likelihood of persistence of depressive  
380 symptoms when compared to participants who did not repeatedly reference experiencing pain.  
381 Our analyses did not reveal any associations between age and likelihood of depression  
382 persistence, nor did they reveal any differences in the likelihood of depression persistence based  
383 on where primary care was received. All study participants were women.

384

385

386 **ACKNOWLEDGEMENTS**

387 The authors would like to acknowledge XXX, particularly XXX, for administrative support on  
388 this project as well as our FQHC XXXs.

389 We would also like to thank XXX for funding the main trial (XXX) with additional  
390 infrastructure support provided through XXX and our Program Officers, XX and XXX for  
391 guidance and advice.

392 **CONFLICT OF INTEREST**

393 The authors declare that they have no conflicts of interest to report.

394 **9.1 Funding:** XXX

395 **9.2 Author contributions:** XXX made substantial contributions to the conceptualization and  
396 design of the work. XXX played a substantial role in the acquisition of data by creating and  
397 maintaining the REDCAP database and extracting data from it for analysis. XXX conducted  
398 qualitative and quantitative analysis and drafted work with substantial contributions and editing  
399 from XXX. All authors reviewed and contributed to the final manuscript.

400 **HUMAN SUBJECTS PROTECTIONS**

401 This secondary analysis did not involve human subjects. The primary research study was  
402 reviewed by the XXX Institutional Review Board.

403

404 **Appendix A.** Intervention Components for Collaborative Care Intervention and Prevention Care  
 405 Management  
 406

|                                         | CCI                                                                                                                                                                                                                                                                           | PCM                                                                                                                                                                                                                                   |
|-----------------------------------------|-------------------------------------------------------------------------------------------------------------------------------------------------------------------------------------------------------------------------------------------------------------------------------|---------------------------------------------------------------------------------------------------------------------------------------------------------------------------------------------------------------------------------------|
| <b>Cancer Screening Component (PCM)</b> | <ul style="list-style-type: none"> <li>Educate and increase cancer screening awareness</li> <li>Provide patient navigation</li> <li>Provide motivational interviewing and support to overcome barriers to cancer screening</li> </ul>                                         | <ul style="list-style-type: none"> <li>Educate and increase cancer screening awareness</li> <li>Provide patient navigation</li> <li>Provide motivational interviewing and support to overcome barriers to cancer screening</li> </ul> |
| <b>Mental Health Component (CCI)</b>    | <ul style="list-style-type: none"> <li>Provide depression education and motivational support to initiate or continue mental health treatment</li> <li>Be an interface between primary care and mental health providers</li> <li>Provide linkage to social services</li> </ul> | <ul style="list-style-type: none"> <li>None</li> </ul>                                                                                                                                                                                |

407 *Note.* CCI=Collaborative Care Intervention; PCM=Prevention Care Management.

408

409

## 410 REFERENCES

- 411 1. Pratt LA, Brody DJ. Depression in the U.S. household population, 2009-2012. NCHS  
412 Data Brief. 2014(172):1-8
- 413 2. Pratt LA, Brody DJ. Depression and obesity in the U.S. adult household population,  
414 2005-2010. NCHS Data Brief. 2014(167):1-8
- 415 3. Wells KB, Stewart A, Hays RD, et al. The functioning and well-being of depressed  
416 patients. Results from the Medical Outcomes Study. JAMA. 1989;262(7):914-919
- 417 4. Blumenthal JA, Lett HS, Babyak MA, et al. Depression as a risk factor for mortality after  
418 coronary artery bypass surgery. Lancet. 2003;362(9384):604-609
- 419 5. Jiang W, Blumenthal JA. Depression and ischemic heart disease: overview of the  
420 evidence and treatment implications. Curr Psychiatry Rep. 2003;5(1):47-54
- 421 6. Centers for Disease Control and Prevention. Mental Health in the United States: Health  
422 Risk Behaviors and Conditions Among Persons with Depression—New Mexico, 2003.  
423 MMWR. 2005;54(39):989-991
- 424 7. Katon WJ, Lin E, Russo J, Unutzer J. Increased medical costs of a population-based  
425 sample of depressed elderly patients. Arch Gen Psychiatry. 2003;60(9):897-903
- 426 8. Ivanova JI, Birnbaum HG, Kidolezi Y, Subramanian G, Khan SA, Stensland MD. Direct  
427 and indirect costs of employees with treatment-resistant and non-treatment-resistant  
428 major depressive disorder. Curr Med Res Opin. 2010;26(10):2475-2484
- 429 9. Johnston K, Westerfield W, Momin S, Phillippi R, Naidoo A. The direct and indirect  
430 costs of employee depression, anxiety, and emotional disorders--an employer case study.  
431 J Occup Environ Med. 2009;51(5):564-577
- 432 10. World Health Organization. Mental health in the workplace. Available at:  
433 [https://www.who.int/team/mental-health-and-substance-use/mental-health-in-the-](https://www.who.int/team/mental-health-and-substance-use/mental-health-in-the-workplace)  
434 [workplace](https://www.who.int/team/mental-health-and-substance-use/mental-health-in-the-workplace). Accessed 2017
- 435 11. Penninx BW, Guralnik JM, Ferrucci L, Simonsick EM, Deeg DJ, Wallace RB.  
436 Depressive symptoms and physical decline in community-dwelling older persons. JAMA.  
437 1998;279(21):1720-1726
- 438 12. Verhaak PF, Dekker JH, de Waal MW, van Marwijk HW, Comijs HC. Depression,  
439 disability and somatic diseases among elderly. J Affect Disord. 2014;167:187-191
- 440 13. Unutzer J, Patrick DL, Diehr P, Simon G, Grembowski D, Katon W. Quality adjusted life  
441 years in older adults with depressive symptoms and chronic medical disorders. *Int*  
442 *Psychogeriatr*. 2000;12(1):15-33
- 443 14. Waitzfelder B, Stewart C, Coleman KJ, et al. Treatment initiation for new episodes of  
444 depression in primary care settings. J Gen Intern Med. 2018;33(8):1283-1291
- 445 15. Fava M. Diagnosis and definition of treatment-resistant depression. Biol Psychiatry.  
446 2003;53(8):649-659
- 447 16. Souery D, Papakostas GI, Trivedi MH. Treatment-resistant depression. J Clin Psychiatry.  
448 2006;67 Suppl 6:16-22
- 449 17. Cole MG, Dendukuri N. Risk factors for depression among elderly community subjects: a  
450 systematic review and meta-analysis. Am J Psychiatry. 2003;160(6):1147-1156
- 451 18. Chima CC, Salemi JL, Wang M, Mejia de Grubb MC, Gonzalez SJ, Zoorob RJ.  
452 Multimorbidity is associated with increased rates of depression in patients hospitalized  
453 with diabetes mellitus in the United States. J Diabetes Complications. 2017;31(11):1571-  
454 1579

- 455 19. U.S. Department of Health and Human Services, National Institutes of Health, National  
456 Institute of Mental Health. Depression. [NIH Publication No. 21-MH-8079]. Available at  
457 <http://www.nimh.nih.gov/health/topics/depression>. Accessed 2018
- 458 20. Wagenaar D, Colenda CC, Kreft M, Sawade J, Gardiner J, Poverejan E. Treating  
459 depression in nursing homes: practice guidelines in the real world. *J Am Osteopath*  
460 *Assoc.* 2003;103(10):465-469
- 461 21. Singh A, Misra N. Loneliness, depression and sociability in old age. *Ind Psychiatry J.*  
462 2009;18(1):51-55
- 463 22. Adler NE, Stead WW. Patients in context--EHR capture of social and behavioral  
464 determinants of health. *N Engl J Med.* 2015;372(8):698-701
- 465 23. Lexalytics. Text Analytics. 2018; <https://www.lexalytics.com/technology/text-analytics>.  
466 Accessed January 30, 2019
- 467 24. Oreskovic NM, Maniates J, Weilburg J, Choy G. Optimizing the use of electronic health  
468 records to identify high-risk psychosocial determinants of health. *JMIR Med Inform.*  
469 2017;5(3):e25
- 470 25. Edgcomb JB, Thiruvalluru R, Pathak J, Brooks JO, 3rd. Machine Learning to  
471 Differentiate Risk of Suicide Attempt and Self-harm After General Medical  
472 Hospitalization of Women With Mental Illness. *Med Care.* 2021;59:S58-S64
- 473 26. Wang D, Ogihara M, Gallo C, et al. Automatic classification of communication logs into  
474 implementation stages via text analysis. *Implement Sci.* 2016;11(1):119
- 475 27. XXX
- 476 28. XXX
- 477 29. Dietrich AJ, Tobin JN, Cassells A, et al. Telephone care management to improve cancer  
478 screening among low-income women: a randomized, controlled trial. *Ann Intern Med.*  
479 2006;144(8):563-571
- 480 30. Jacob V, Chattopadhyay SK, Sipe TA, et al. Economics of collaborative care for  
481 management of depressive disorders: a community guide systematic review. *Am J Prev*  
482 *Med.* 2012;42(5):539-549
- 483 31. Thota AB, Sipe TA, Byard GJ, et al. Collaborative care to improve the management of  
484 depressive disorders: a community guide systematic review and meta-analysis. *Am J Prev*  
485 *Med.* 2012;42(5):525-538
- 486 32. Kroenke K, Spitzer RL, Williams JB. The PHQ-9: validity of a brief depression severity  
487 measure. *J Gen Intern Med.* 2001;16(9):606-613
- 488 33. Spitzer RL, Kroenke K, Williams JB, Lowe B. A brief measure for assessing generalized  
489 anxiety disorder: the GAD-7. *Arch Intern Med.* 2006;166(10):1092-1097
- 490 34. McMillan D, Gilbody S, Richards D. Defining successful treatment outcome in  
491 depression using the PHQ-9: a comparison of methods. *J Affect Disord.* 2010;127(1-  
492 3):122-129
- 493 35. Pfizer. Patient health questionnaire (PHQ) and GAD7 Instructions.  
494 <https://www.phqscreeners.com/select-screener>. Accessed February 12, 2019
- 495 36. Stubbs B, Koyanagi A, Thompson T, et al. The epidemiology of back pain and its  
496 relationship with depression, psychosis, anxiety, sleep disturbances, and stress sensitivity:  
497 Data from 43 low- and middle-income countries. *Gen Hosp Psychiatry.* 2016;43:63-70
- 498 37. Tsuji T, Matsudaira K, Sato H, Vietri J. The impact of depression among chronic low  
499 back pain patients in Japan. *BMC Musculoskelet Disord.* 2016;17(1):447

- 500 38. Vietri J, Otsubo T, Montgomery W, Tsuji T, Harada E. The incremental burden of pain in  
501 patients with depression: results of a Japanese survey. *BMC Psychiatry*. 2015;15:104
- 502 39. Vietri J, Otsubo T, Montgomery W, Tsuji T, Harada E. Association between pain  
503 severity, depression severity, and use of health care services in Japan: results of a  
504 nationwide survey. *Neuropsychiatr Dis Treat*. 2015;11:675-683
- 505 40. Fitzpatrick AL, Powe NR, Cooper LS, Ives DG, Robbins JA. Barriers to health care  
506 access among the elderly and who perceives them. *Am J Public Health*.  
507 2004;94(10):1788-1794
- 508 41. Syed ST, Gerber BS, Sharp LK. Traveling towards disease: transportation barriers to  
509 health care access. *J Community Health*. 2013;38(5):976-993
- 510 42. Reinhard E, Courtin E, van Lenthe FJ, Avendano M. Public transport policy, social  
511 engagement and mental health in older age: a quasi-experimental evaluation of free bus  
512 passes in England. *J Epidemiol Community Health*. 2018;72(5):361-368
- 513 43. Weir RC, Emerson HP, Tseng W, et al. Use of enabling services by Asian American,  
514 Native Hawaiian, and other Pacific Islander patients at 4 community health centers. *Am J*  
515 *Public Health*. 2010;100(11):2199-2205
- 516 44. Park H. Enabling Services at Health Centers: Eliminating Disparities and Improving  
517 Quality October 2006.. Paper presented at: New York Academy of Medicine Enabling  
518 Services Roundtable Report; September 29, 2005, New York, NY
- 519 45. Brinda EM, Rajkumar AP, Attermann J, Gerdtham UG, Enemark U, Jacob KS. Health,  
520 Social, and Economic Variables Associated with Depression Among Older People in  
521 Low and Middle Income Countries: World Health Organization Study on Global AGEing  
522 and Adult Health. *Am J Geriatr Psychiatry*. 2016;24(12):1196-1208
- 523 46. Di Marco F, Santus P, Centanni S. Anxiety and depression in asthma. *Curr Opin Pulm*  
524 *Med*. 2011;17(1):39-44
- 525 47. Sastre J, Crespo A, Fernandez-Sanchez A, Rial M, Plaza V, investigators of the CSG.  
526 Anxiety, depression, and asthma control: changes after standardized treatment. *J Allergy*  
527 *Clin Immunol Pract*. 2018;6(6):1953-1959
- 528 48. Ciprandi G, Schiavetti I, Rindone E, Ricciardolo FL. The impact of anxiety and  
529 depression on outpatients with asthma. *Ann Allergy Asthma Immunol*. 2015;115(5):408-  
530 414
- 531 49. Ahmedani BK, Peterson EL, Wells KE, Williams LK. Examining the relationship  
532 between depression and asthma exacerbations in a prospective follow-up study.  
533 *Psychosom Med*. 2013;75(3):305-310
- 534 50. Kessler RC, Berglund P, Demler O, Jin R, Merikangas KR, Walters EE. Lifetime  
535 prevalence and age-of-onset distributions of DSM-IV disorders in the National  
536 Comorbidity Survey Replication. *Arch Gen Psychiatry*. 2005;62(6):593-602
- 537 51. Kessler RC, Birnbaum HG, Shahly V, et al. Age differences in the prevalence and co-  
538 morbidity of DSM-IV major depressive episodes: results from the WHO World Mental  
539 Health Survey Initiative. *Depress Anxiety*. 2010;27(4):351-364



543 **FIGURE CAPTIONS**

544 **Figure 1. Word clouds representing frequency of word use for PCM vs. CCI study arm**  
545 **case logs**

546 **Legend**

547 PCM: Prevention Care Management

548 CCI: Collaborative Care Intervention

549

550 **Figure 2. Word clouds representing frequency of word use for patients who did and did not**  
551 **experience clinically meaningful improvement in depression**

552

553

**Table 1. Mapping of themes to terms<sup>a</sup>**

| <b>Theme</b>     | <b>Select Associated terms for which text was search</b>                           |
|------------------|------------------------------------------------------------------------------------|
| Death            | Death, died, passed away, passed on, funeral                                       |
| Depression       | Depression, sad, antidepressant                                                    |
| Fear             | Afraid, fear, scared, terrified                                                    |
| Financial issues | Afford, cost, finances, food stamps                                                |
| Housing          | Rent, evicted, housing, homeless, apartment, shelter                               |
| Illness          | Sick, exacerbation, surgery, hospitalized, ill, under the weather, health problems |
| Insurance        | Insurance, co-pay, coverage, health plan, insurance plan                           |
| Loneliness       | Alone, lonely, isolated                                                            |
| Pain             | Pain, painful, hurt                                                                |
| Substance use    | Addiction, substance use, rehab, alcoholic, intoxicated                            |
| Transportation   | Ride, transportation, bus, subway, Access a Ride                                   |

554 <sup>a</sup>Note: NVivo<sup>®</sup> has the capability to search for all terms with the same stem. This functionality allowed us to  
555 conduct our analyses without compiling an exhaustive list of terms.

556

557

558 **Table 2. Demographic characteristics of study participants**

|                                       | <b>PCM<sup>a</sup> (n=323)</b> | <b>CCI<sup>b</sup> (n=306)</b> | <b>p-value<sup>c</sup></b> |
|---------------------------------------|--------------------------------|--------------------------------|----------------------------|
| <b>Age mean (SD)</b>                  | 55.9 (4.2)                     | 56.2 (4.25)                    | 0.1452                     |
| <b>Race/ethnicity</b>                 | n (%)                          | n (%)                          | 0.4348                     |
| Hispanic or Latino                    | 261 (81)                       | 238 (78)                       |                            |
| Black/African American                | 53(16)                         | 65(21)                         |                            |
| White                                 | 13 (4)                         | 12 (4)                         |                            |
| Asian                                 | 1                              | 0                              |                            |
| American Indian/Alaskan Native        | 2 (1)                          | 1                              |                            |
| <b>Language</b>                       |                                |                                | 0.7830                     |
| English                               | 131 (41)                       | 127 (42)                       |                            |
| Spanish                               | 192 (59)                       | 178 (58)                       |                            |
| <b>Education</b>                      |                                |                                | 0.6343                     |
| <i>12 years/completed high school</i> | 68 (21)                        | 73 (24)                        |                            |
| <i>College graduate</i>               | 27 (8)                         | 23 (8)                         |                            |
| <i>Less than 8 years</i>              | 70 (22)                        | 75 (25)                        |                            |
| <i>Vocational/technical school</i>    | 5 (1)                          | 7 (2)                          |                            |
| <i>Postgraduate</i>                   | 2 (0.6)                        | 4 (1)                          |                            |
| <i>Some college</i>                   | 38 (12)                        | 34 (11)                        |                            |
| <i>8-11 years</i>                     | 110 (34)                       | 86 (28)                        |                            |

559 <sup>a</sup>PCM: Prevention Care Management

560 <sup>b</sup>CCI: Collaborative Care Intervention

561 <sup>c</sup>p-value: calculated probability

562

563 **Table 3. Sample case log text and frequency of appearance for salient themes**

| <b>Theme</b>                | <b>Sample case log text</b>                                                                                                                                                                                                        | <b>Frequency of use</b> |
|-----------------------------|------------------------------------------------------------------------------------------------------------------------------------------------------------------------------------------------------------------------------------|-------------------------|
| Illness                     | <i>Patient said she is ‘fine.’ She is still waiting on her surgery.</i><br><br><i>Patient stated she did not get to follow through with her appointment for psychotherapy because [her] 4-year- old grandson just had surgery.</i> | 817 references          |
| Financial difficulties      | <i>Patient was sick and experiencing financial difficulties.</i>                                                                                                                                                                   | 318 references          |
| Substance use               | <i>Patient stated that although it’s been hard dealing with her son who is a drug addict, she is doing better.</i>                                                                                                                 | 39 references           |
| Death                       | <i>Her fiancé passed away almost a year ago that she has not fully recovered from and now her sister passed away 2 months ago.</i>                                                                                                 | 100 references          |
| Fear                        | <i>Patient stated she is “afraid of going to [her] appointments.</i>                                                                                                                                                               | 93 references           |
| Transportation difficulties | <i>The only problem she is having is transportation to and from her appointment.</i><br><br><i>Patient stated she “has not come in due to transportation.”</i>                                                                     | 90 references           |
| Housing                     | <i>Patient stated she “lives in the basement and is always at the point of getting evicted.”</i>                                                                                                                                   | 125 references          |
| Pain                        | <i>Patient stated she “is about the same.” Her “arthritis hurts every now and then. The pain comes and goes but she’s ok.”</i>                                                                                                     | 165 references          |
| Insurance issues            | <i>Patient has “not attended to mammogram due to insurance losing.”</i>                                                                                                                                                            | 258 references          |

564

565 **Table 4. Frequency of theme references among unique participants whose depression**  
566 **improved\* vs. did not improve**

|                | References among patients whose depression improved<br>(number of patients) | References among patients whose depression had not improved<br>(number of patients) |
|----------------|-----------------------------------------------------------------------------|-------------------------------------------------------------------------------------|
| Death          | 29 (10)                                                                     | 71 (19)                                                                             |
| Depression     | 198 (42)                                                                    | 310 (56)                                                                            |
| Fear           | 27 (12)                                                                     | 66 (23)                                                                             |
| Financial      | 156 (43)                                                                    | 162 (43)                                                                            |
| Housing        | 62 (24)                                                                     | 63 (24)                                                                             |
| Insurance      | 135 (35)                                                                    | 123 (32)                                                                            |
| Lonely         | 4 (2)                                                                       | 20 (7)                                                                              |
| Pain           | 74 (24)                                                                     | 176 (51)                                                                            |
| Sick           | 358 (81)                                                                    | 459 (123)                                                                           |
| Substance use  | 8 (3)                                                                       | 31 (7)                                                                              |
| Transportation | 18 (3)                                                                      | 72 (16)                                                                             |

567



**Figure 2. Word clouds representing frequency of word use for patients who did and did not experience clinically meaningful improvement in depression**

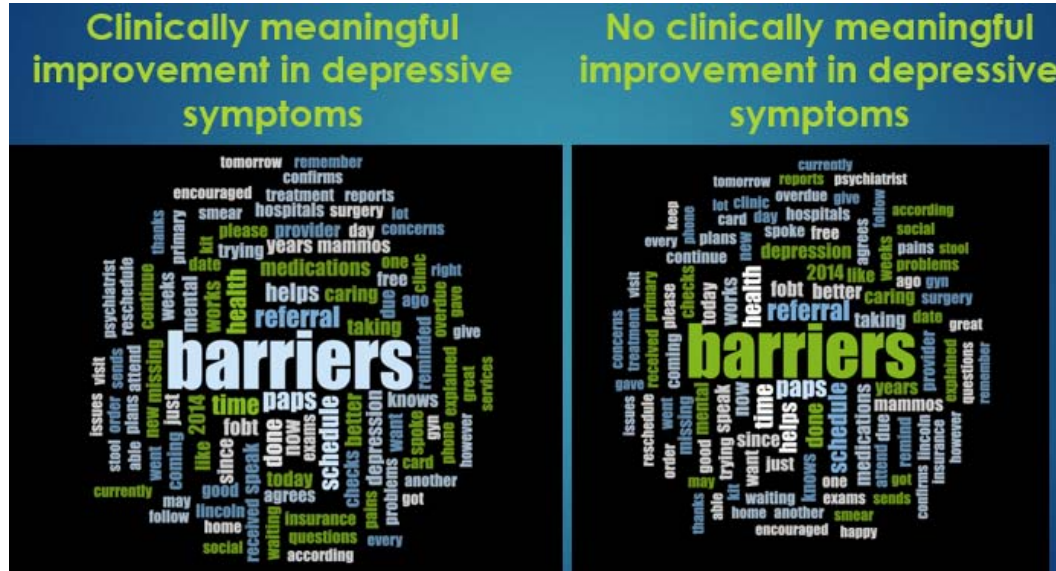

Source: https://www.medrxiv.org/content/10.1101/2022.07.19.22276147v1.full.pdf
